# Supplementary material
Source: publisher figshare collection journal article supplement (https://gsajournals.figshare.com/articles/dataset/_/12181998)
Supplement: Supplementary file 1 [file 1]

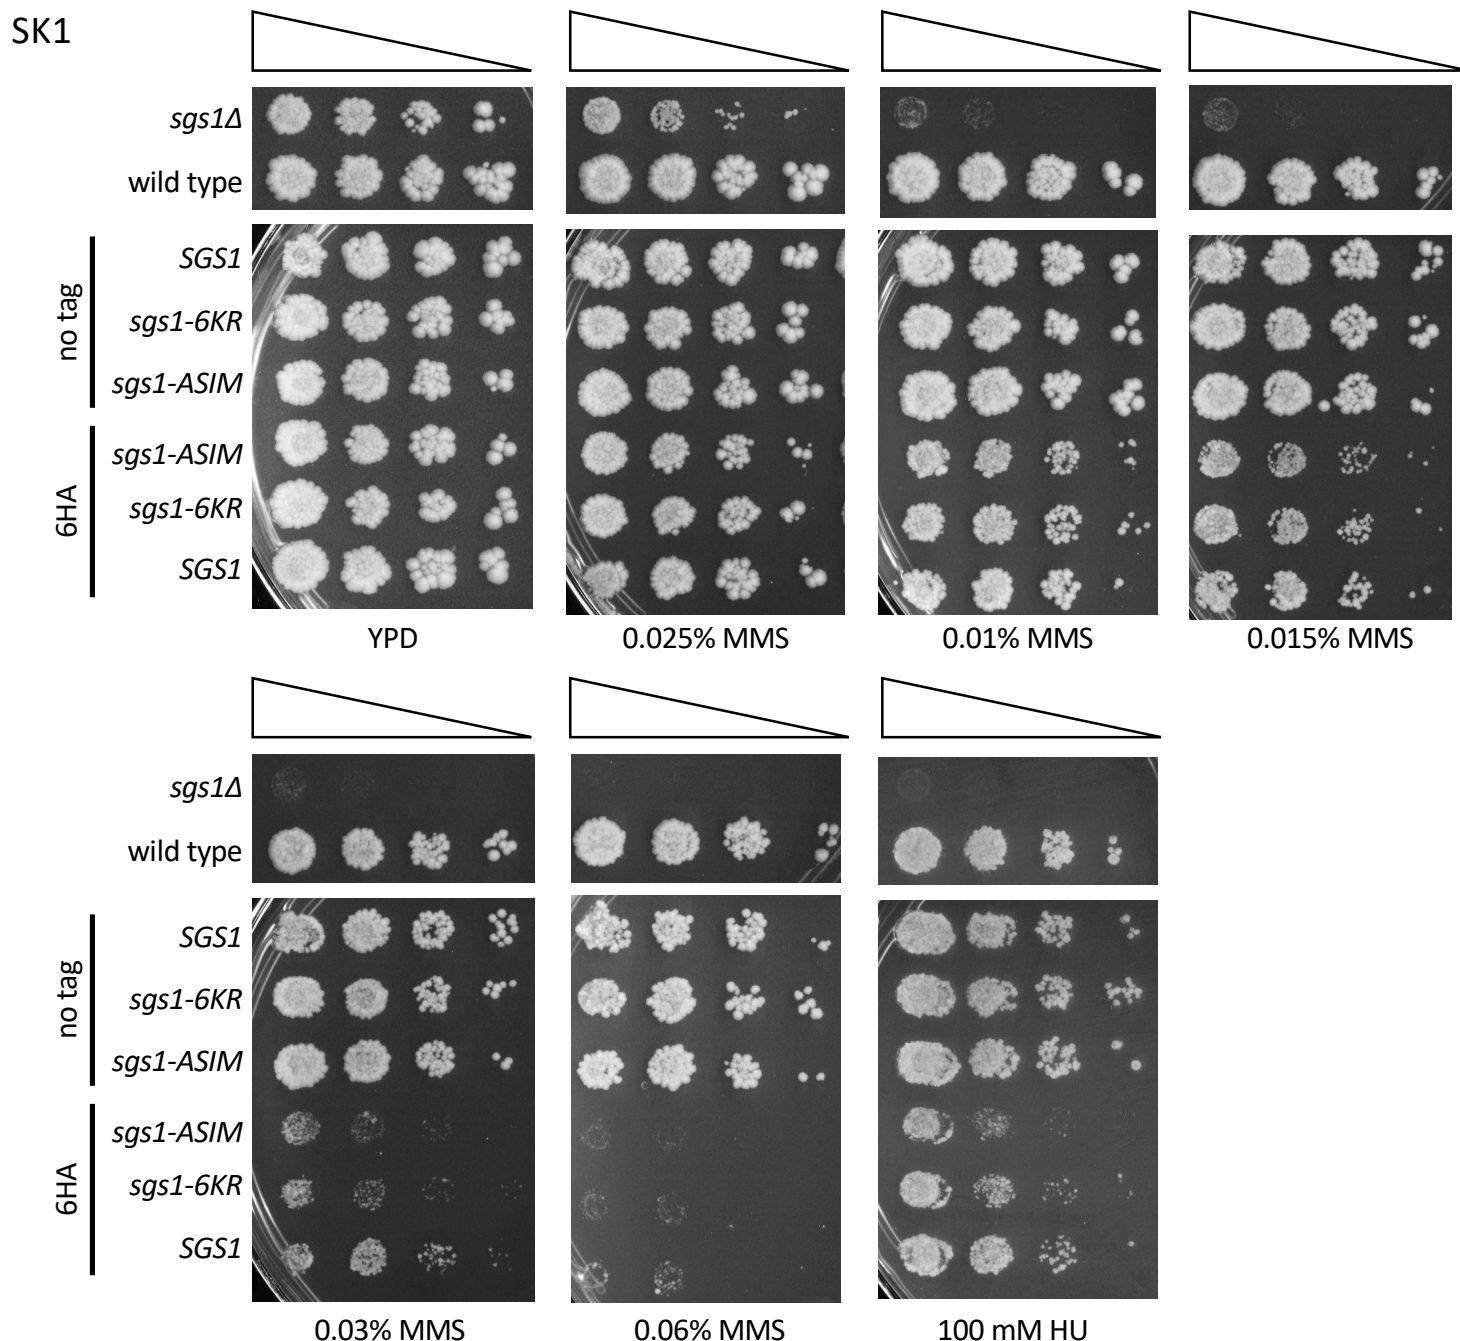

**Figure S1.** MMS-sensitivity of *SGS1* SUMO-site mutant alleles from Bermudez-Lopez et al (2016). SK1 strains with the indicated *SGS1* alleles (see Figures 1 and 2 for details) were spotted in a 10-fold dilution series on plates with different MMS concentrations and incubated at 30°C for 2-3 days. Note that SUMO-site mutants without a 6HA tag show wild-type resistance to MMS and HU, while, in the context of a 6HA tag, SUMO-site mutants are slightly more sensitive than the already-sensitive 6HA-tagged wild-type allele.

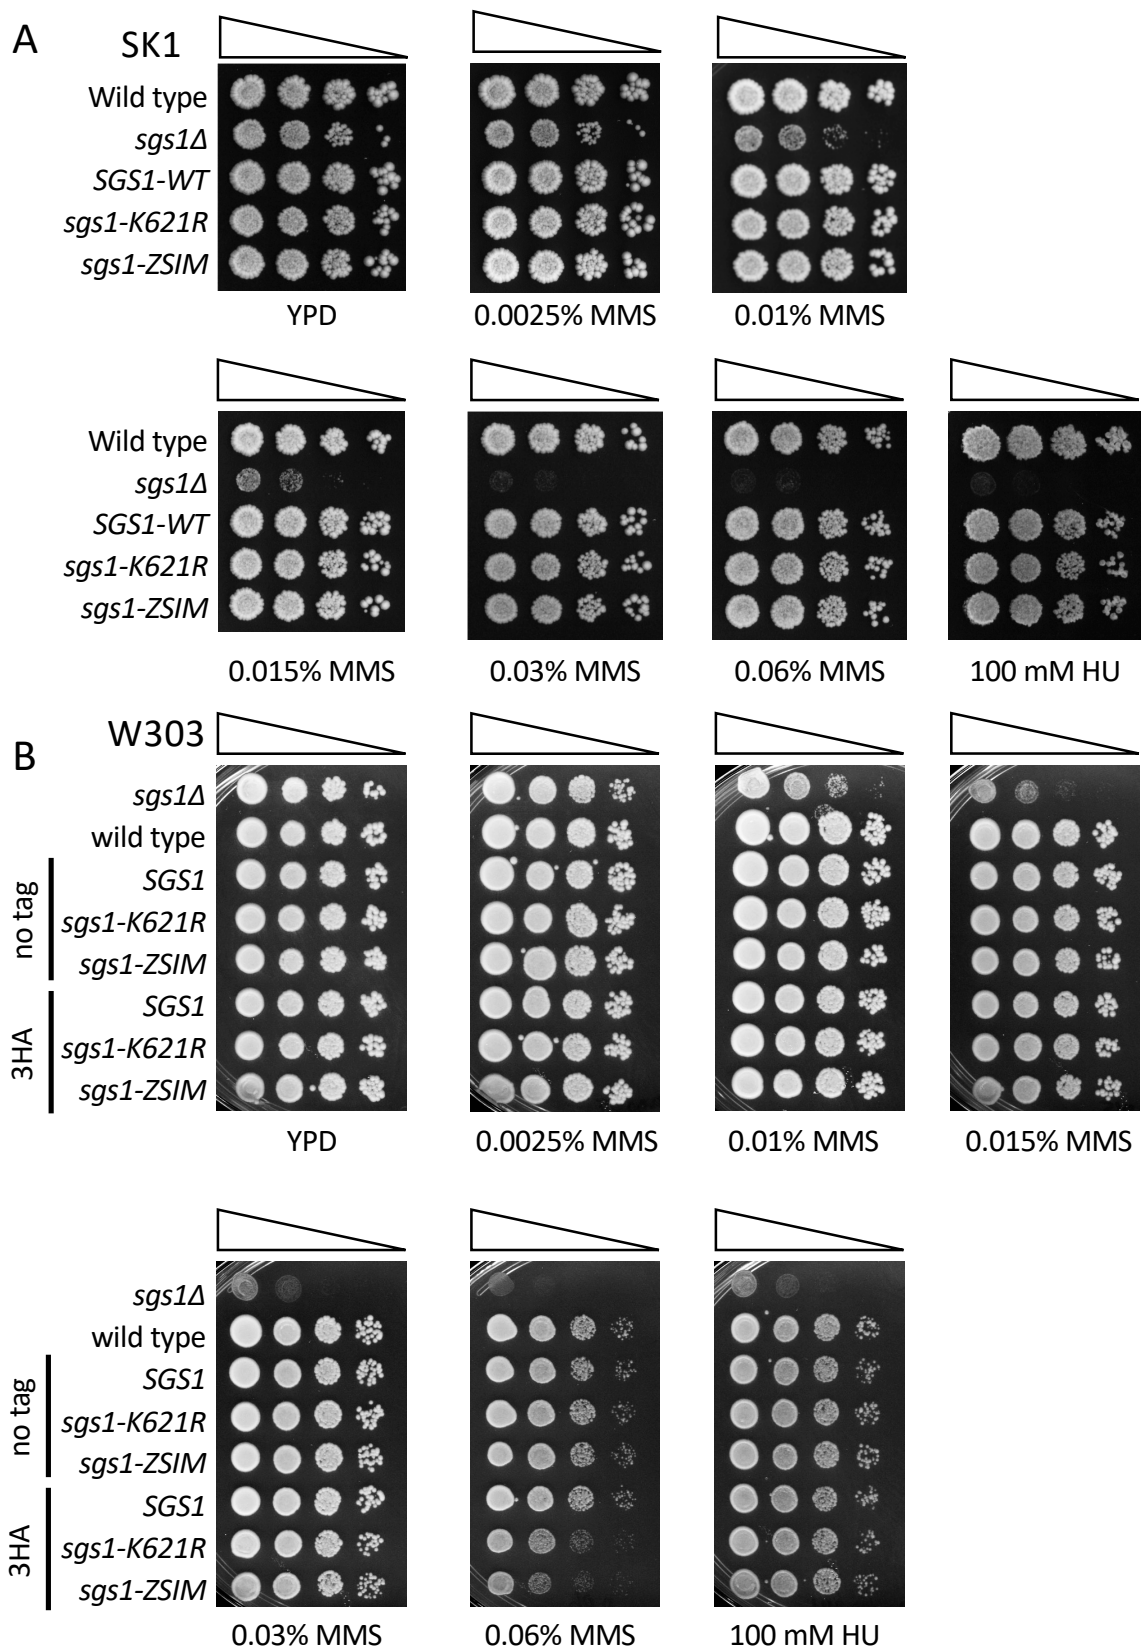

**Figure S2.** MMS sensitivity of *SGS1* SUMO-site mutant alleles from Bonner et al. (2016). A) SK1 strains with the indicated *SGS1* alleles (all without a C-terminal tag) were spotted in a 10-fold dilution series on plates with different MMS concentrations and incubated at 30°C for 2-3 days. B) As in A, but with W303 strains. Note that in an untagged context, SUMO-site mutants show wild-type resistance to MMS, as does a strain with a 3HA-tagged *SGS1* allele. In the context of a 3HA C-terminal tag, SUMO-site mutants are slightly more sensitive to 0.06% MMS than is wild type.
